# Supplementary material
Source: PubMed Central journal article supplement (PMC3650553)
Supplement: JB.00164-13_zjb999092587so1.pdf [file JB.00164-13_zjb999092587so1.pdf]

1 **Table S1.** Oligonucleotides used in this study

|        |                                                                             |
|--------|-----------------------------------------------------------------------------|
| CC132  | GACGTA <sup>ACTCGTTACCGTGAGT</sup>                                          |
| CC133  | TTTGACGCCGTGACAGTCACCGTAT                                                   |
| CC175  | atatgatccGCGATTAAAGAAGCGAGCGGAGACCTC                                        |
| CC546  | ATTTATATCATATGTACGAGTTTAAAGATTATTATCAGAATACTG                               |
| CC768  | GCGCTGATAGACGGAAA <sup>ACTG</sup>                                           |
| CC770  | GACTGCTAGTTCTTTGCCGTTTGC                                                    |
| CC772  | CTTGTTACTAGTTAAGCAACAACCAAGTTCATAGC                                         |
| CC773  | CTTGTTGGATCCCTTGAAAATTCCTTGCCGTC                                            |
| CC1010 | GGTTTTAGTCCACTCTCAACTCCTGATC                                                |
| CC1090 | CCACGAAAAGTCTTCCTCAATCTCCGTATACTATTG                                        |
| CC1091 | GGAGGGACTGGCTAATGCTGCGTAAATTAAG                                             |
| CC1092 | ccgaagtatTTTTcactttattaatftgtcgtatgtattcatACCGCTCATAACTCCAATACTTTAAAATTTTCG |
| CC1093 | CGAAAATTTTAAAGTATTGGAGTTATGAGCGGTatgaatacatacgaacaattaataaagtgaaaaaacttcgg  |
| CC1094 | ctatttaataacagattaaaaaattataaCATTATGGAGGTTTAAAAAAGAGGCACTCCCTAAG            |
| CC1095 | CTTAGGGAGTGCCTCTTTTTTTAAACCTCCATAATGttataatTTTTtaactgttatttaaatag           |
| CC1096 | GGATTCAAGAGCGGAGCGATTGCCACAACC                                              |
| CC1114 | CAATTCCGGTGATATTCTCATTTTAGCcatACCGCTCATAACTCCAATACTTTAAAATTTTCG             |
| CC1115 | CGAAAATTTTAAAGTATTGGAGTTATGAGCGGTatgGCTAAAATGAGAATATCACCGGAATTG             |
| CC1116 | TAAAATATTATATTTTACTGGATGAATIGTTTtagCATTATGGAGGTTTAAAAAAGAGGCACTCCCTAAG      |
| CC1117 | CTTAGGGAGTGCCTCTTTTTTTAAACCTCCATAATGctaAAACAATTCATCCAGTAAAATATAATATTTTA     |
| HP279  | GCATCGGCATAACCACCACGC                                                       |

2 Non-hybridising sequences are shown in lower case letters

3

4

1 **Table S2.** Fold-changes in sporulation and competence related transcripts in RNase J1 or RNase  
 2 Y depletion strains compared to wild-type in (Durand et al., 2012a).

| Gene                     | RNase J1↓ | RNase Y↓ | Profile J1/Y |
|--------------------------|-----------|----------|--------------|
| <b>Sporulation genes</b> |           |          |              |
| <i>spo0A</i>             | 2.9       | 2.4      | UU           |
| <i>spo0B</i>             | 2.3       | 1.1      | U-           |
| <i>spo0E</i>             | 6.3       | 1.4      | U-           |
| <i>spoIID</i>            | 4.5       | 3.7      | UU           |
| <i>spoIIE</i>            | 5.0       | 2.3      | UU           |
| <i>spoIIIAE</i>          | 1.0       | 2.1      | -U           |
| <i>spoIIIC</i>           | 5.1       | 3.7      | UU           |
| <i>spoIIIE</i>           | 2.4       | 2.1      | UU           |
| <i>spoIIP</i>            | 2.9       | 1.9      | U-           |
| <i>spoIIR</i>            | 1.2       | 2.0      | -U           |
| <i>spoIISA</i>           | 2.0       | 8.6      | UU           |
| <i>spoIISB</i>           | 5.1       | 8.5      | UU           |
| <i>spoIVFA</i>           | 2.2       | 2.5      | UU           |
| <i>spoIVFB</i>           | 3.0       | 3.2      | UU           |
| <i>spoVAEA</i>           | 1.3       | 2.4      | -U           |
| <i>spoVAF</i>            | 1.3       | 2.4      | -U           |
| <i>spoVB</i>             | 1.1       | 2.2      | -U           |
| <i>spoVE</i>             | 3.1       | 1.0      | U-           |
| <i>spoVFA</i>            | 1.3       | 2.1      | -U           |
| <i>spoVG</i>             | 0.2       | 0.3      | DD           |
| <i>spoVID</i>            | 1.0       | 2.3      | -U           |
| <i>spoVM</i>             | 2.2       | 1.0      | U-           |
| <i>spoVR</i>             | 1.7       | 3.3      | -U           |
| <b>Competence genes</b>  |           |          |              |
| <i>comEB</i>             | 2.3       | 2.8      | UU           |
| <i>comEC</i>             | 1.4       | 2.1      | -U           |
| <i>comER</i>             | 1.2       | 3.2      | -U           |
| <i>comK</i>              | 2.6       | 1.0      | U-           |
| <i>comN</i>              | 0.5       | 0.5      | -D           |
| <i>comQ</i>              | 0.4       | 0.7      | D-           |
| <i>comS</i>              | 0.4       | 0.6      | D-           |
| <i>comZ</i>              | 1.5       | 2.1      | -U           |

3 (U) up-regulated, (D) is down-regulated, (-) unchanged.

4

5

1 **Table S3.** Fold-changes in cell envelope biosynthesis related transcripts in RNase J1 or RNase Y  
 2 depletion strains compared to wild-type in (Durand et al., 2012a).

| Name                                     | RNase J1↓ | RNase Y↓ | Profile J1/Y |
|------------------------------------------|-----------|----------|--------------|
| <b>Biosynthesis of peptidoglycan</b>     |           |          |              |
| <i>gcaD</i>                              | 1.1       | 0.4      | -D           |
| <i>glmS</i>                              | 2.2       | 0.7      | U-           |
| <i>murAA</i>                             | 2.4       | 3.0      | UU           |
| <i>murB</i>                              | 2.5       | 4.9      | UU           |
| <i>murG</i>                              | 2.5       | 5.8      | UU           |
| <i>racE</i>                              | 2.3       | 1.3      | U-           |
| <i>spoVB</i>                             | 1.1       | 2.2      | -U           |
| <i>spoVE</i>                             | 3.1       | 1.0      | U-           |
| <i>yabM</i>                              | 2.7       | 3.9      | UU           |
| <i>ykuD (ldt)</i>                        | 4.2       | 8.6      | UU           |
| <i>ytgP</i>                              | 2.1       | 3.7      | UU           |
| <i>yycJ (walJ)</i>                       | 3.4       | 2.4      | UU           |
| <b>Biosynthesis of lipoteichoic acid</b> |           |          |              |
| <i>dgkA</i>                              | 1.9       | 2.1      | -U           |
| <i>ltaSA</i>                             | 1.0       | 3.6      | -U           |
| <i>yqgS</i>                              | 3.0       | 1.7      | U-           |
| <i>yvgJ</i>                              | 1.5       | 2.1      | -U           |
| <b>Biosynthesis of teichoic acid</b>     |           |          |              |
| <i>dltA</i>                              | 2.3       | 3.1      | UU           |
| <i>dltB</i>                              | 2.3       | 2.7      | UU           |
| <i>dltC</i>                              | 2.4       | 2.6      | UU           |
| <i>dltD</i>                              | 2.4       | 2.8      | UU           |
| <i>dltE</i>                              | 3.1       | 2.8      | UU           |
| <i>ggaB</i>                              | 1.1       | 0.4      | -D           |
| <i>mnaA</i>                              | 2.0       | 0.9      | U-           |
| <i>pgcA (gtaC)</i>                       | 2.1       | 1.7      | U-           |
| <i>tagA</i>                              | 1.9       | 2.7      | -U           |
| <i>tagB</i>                              | 1.2       | 2.1      | -U           |
| <i>tagO</i>                              | 1.4       | 2.9      | -U           |
| <b>Biosynthesis of teichuronic acid</b>  |           |          |              |
| <i>tuaA</i>                              | 1.0       | 4.5      | -U           |
| <i>tuaA</i>                              | 1.1       | 6.0      | -U           |
| <i>tuaB</i>                              | 1.6       | 5.5      | -U           |
| <i>tuaC</i>                              | 1.4       | 4.3      | -U           |
| <i>tuaD</i>                              | 1.4       | 3.9      | -U           |
| <i>tuaE</i>                              | 1.2       | 3.1      | -U           |
| <i>tuaF</i>                              | 1.2       | 2.6      | -U           |
| <i>tuaG</i>                              | 1.3       | 2.6      | -U           |
| <i>tuaH</i>                              | 1.2       | 2.5      | -U           |

**Penicillin binding proteins**

|             |     |     |    |
|-------------|-----|-----|----|
| <i>dacB</i> | 2.4 | 2.2 | UU |
| <i>dacC</i> | 0.5 | 0.6 | D- |
| <i>pbpA</i> | 1.0 | 2.1 | -U |
| <i>pbpC</i> | 0.7 | 0.2 | -D |
| <i>pbpE</i> | 0.4 | 0.5 | D- |
| <i>pbpG</i> | 1.6 | 3.8 | -U |
| <i>pbpH</i> | 3.0 | 1.0 | U- |
| <i>pbpI</i> | 1.4 | 4.5 | -U |
| <i>pbpX</i> | 1.4 | 2.4 | -U |
| <i>ponA</i> | 1.5 | 2.4 | -U |

**Export of anionic polymers and attachment to peptidoglycan**

|                     |     |     |    |
|---------------------|-----|-----|----|
| <i>lytR (tagU)</i>  | 3.1 | 0.5 | U- |
| <i>tagG</i>         | 0.8 | 4.0 | -U |
| <i>tagH</i>         | 1.1 | 3.7 | -U |
| <i>yvhJ (tagV)</i>  | 3.0 | 1.3 | U- |
| <i>ywtF (tag T)</i> | 2.4 | 4.7 | UU |

---

1 (U) up-regulated, (D) is down-regulated, (-) unchanged.

2

3

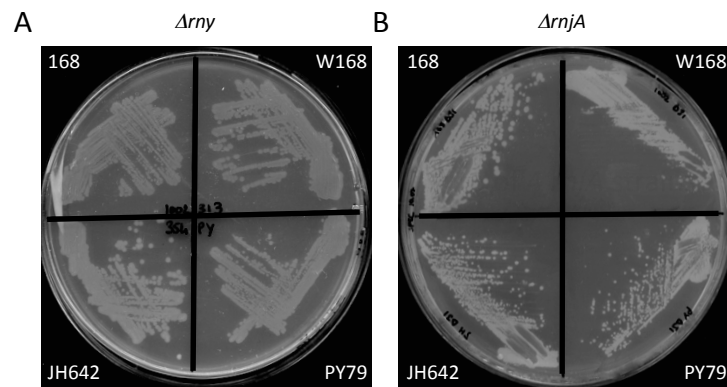

**Figure S1.** Deletion mutants of RNase Y and J1 are viable in four commonly used *B. subtilis* genetic backgrounds. Luria Bertani (LB) plates showing growth of (A)  $\Delta rny$  and (B)  $\Delta rnjA$  mutants in strains 168 *trpC2*, W168 *trp<sup>+</sup>*, JH642 *trpC2 pheA1* and PY79  $\Delta SP\beta$ .

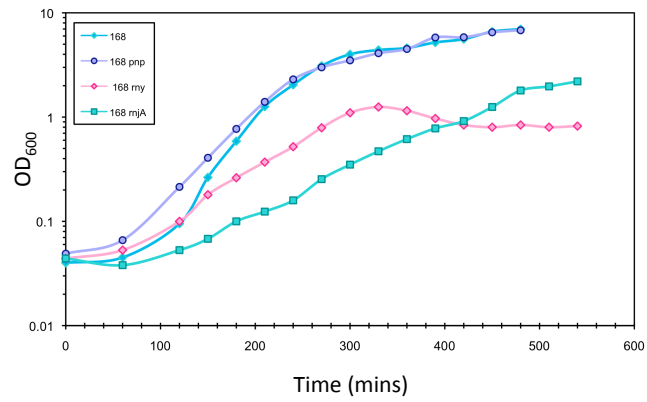

**Figure S2.** Growth curves of RNase mutant strains in liquid medium. Cells were grown in 2xYT medium in Erlenmeyer flasks with orbital shaking at 200 rpm and an air/liquid ratio of 10.

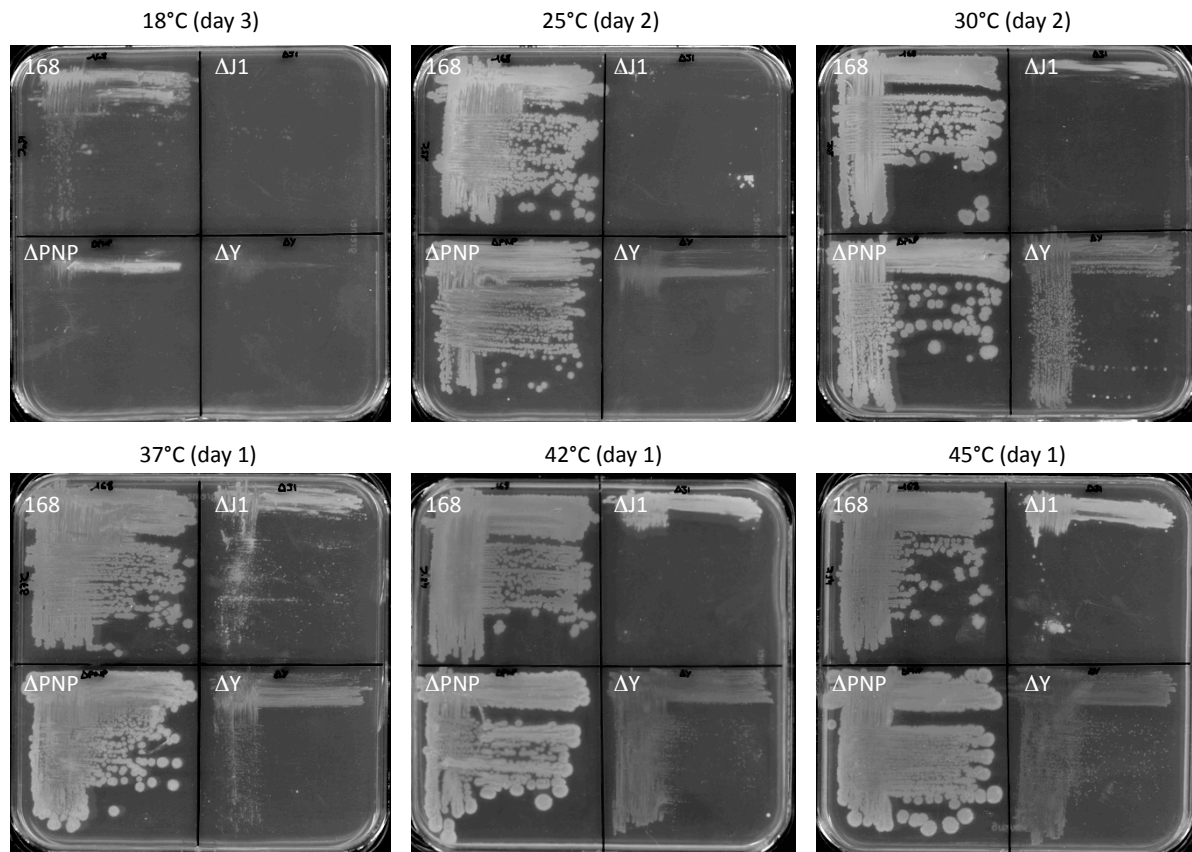

**Figure S3.** Effect of temperature on RNase mutants. Cells were streaked out on LB plates and incubated at the temperatures indicated for the times shown.

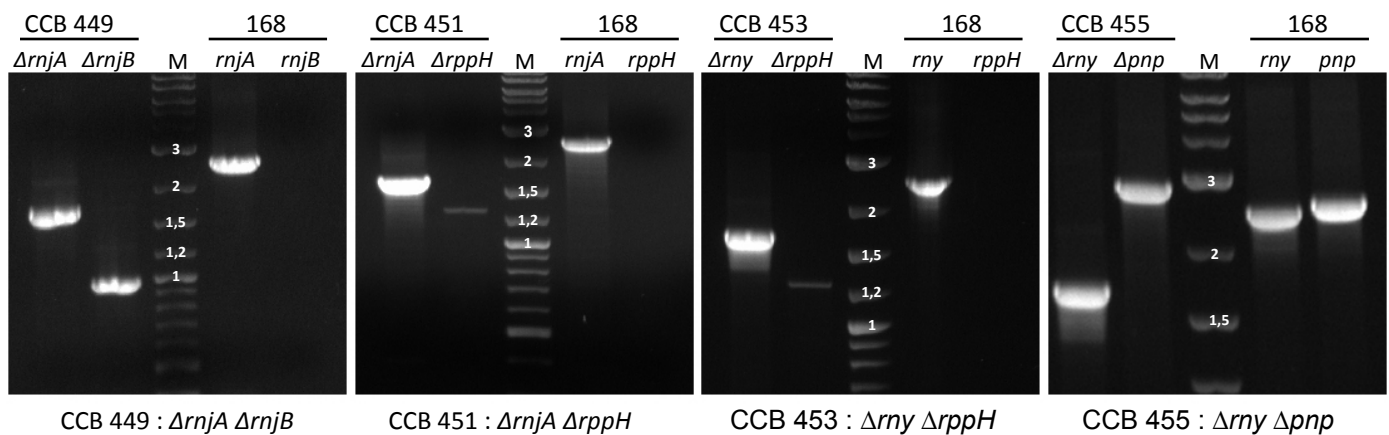

**Figure S4.** Confirmation of double mutants by PCR. Deletions were verified by colony PCR using the following oligonucleotide pairs: *rnjA* (CC1090/1096); *rny* (CC768/770); *pnp* (CC132/133); *rnjB* (CC175/1010); *rppH* (HP279/CC546). For *rppH* and *rnjB*, the lower oligonucleotide hybridizes to the antibiotic resistance cassette and therefore only yields a product in the mutant strain. A DNA marker (M) is shown in the middle of the gel. Expected sizes were as follows: *rnjA* (WT/mutant: 2.57 vs 1.66 bp), *rny* (WT/mutant: 2.54 vs 1.73 bp), *pnp* (WT/mutant: 2.59 vs 2.8 kb), *rnjB* (WT/mutant: no product vs 996 bp); *rppH* (WT/mutant: no product vs 1.30 kb).
